# Supplementary material for: High fructose exposure modifies the amount of adipocyte-secreted microRNAs into extracellular vesicles in supernatants and plasma
Source: PeerJ journal article supplement (doi:10.7717/peerj.11305), 2021-05-19

ANXA2

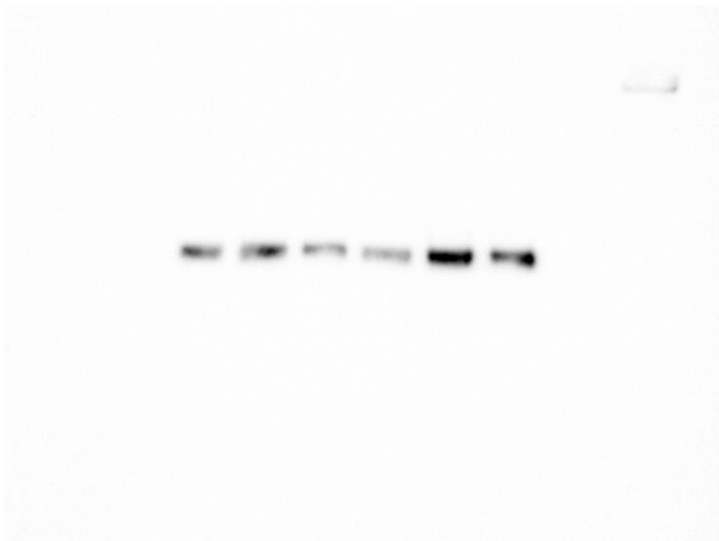

CD63

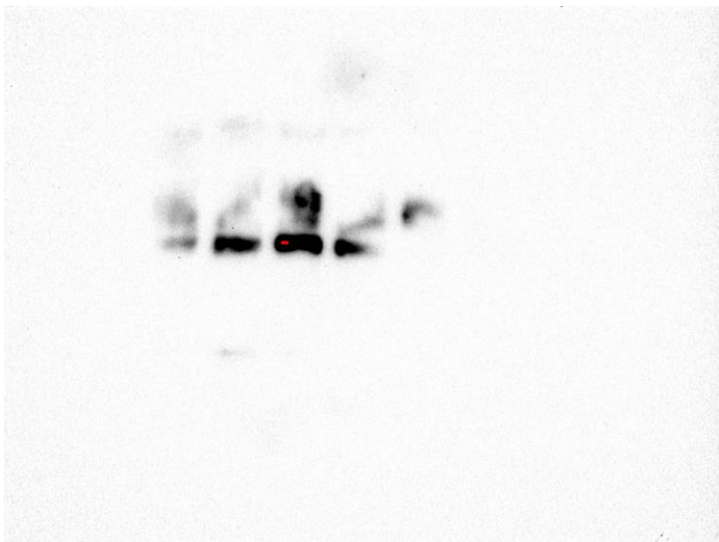

CD81

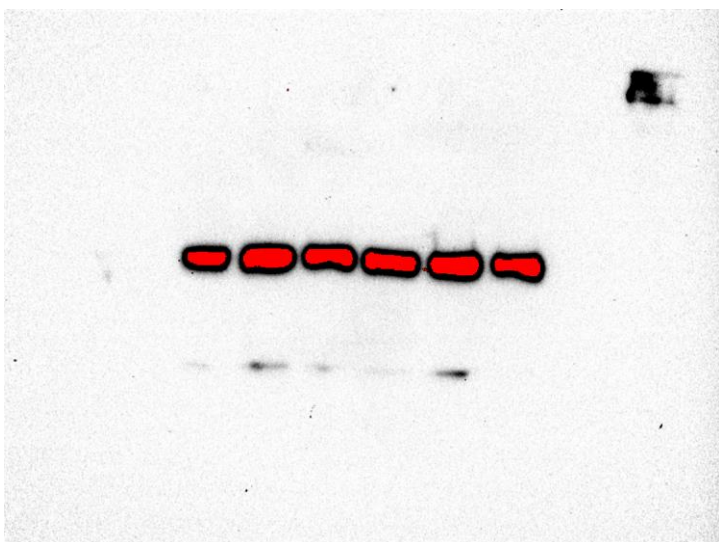

Supplement: Blots.pdf [file Blots.pdf]
