# Supplementary material for: High fructose exposure modifies the amount of adipocyte-secreted microRNAs into extracellular vesicles in supernatants and plasma
Source: PeerJ journal article supplement (doi:10.7717/peerj.11305), 2021-05-19

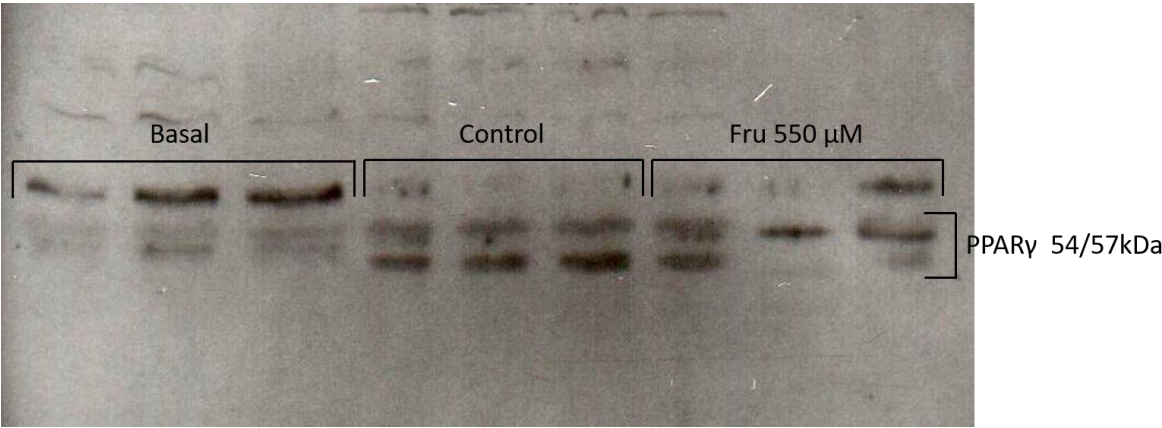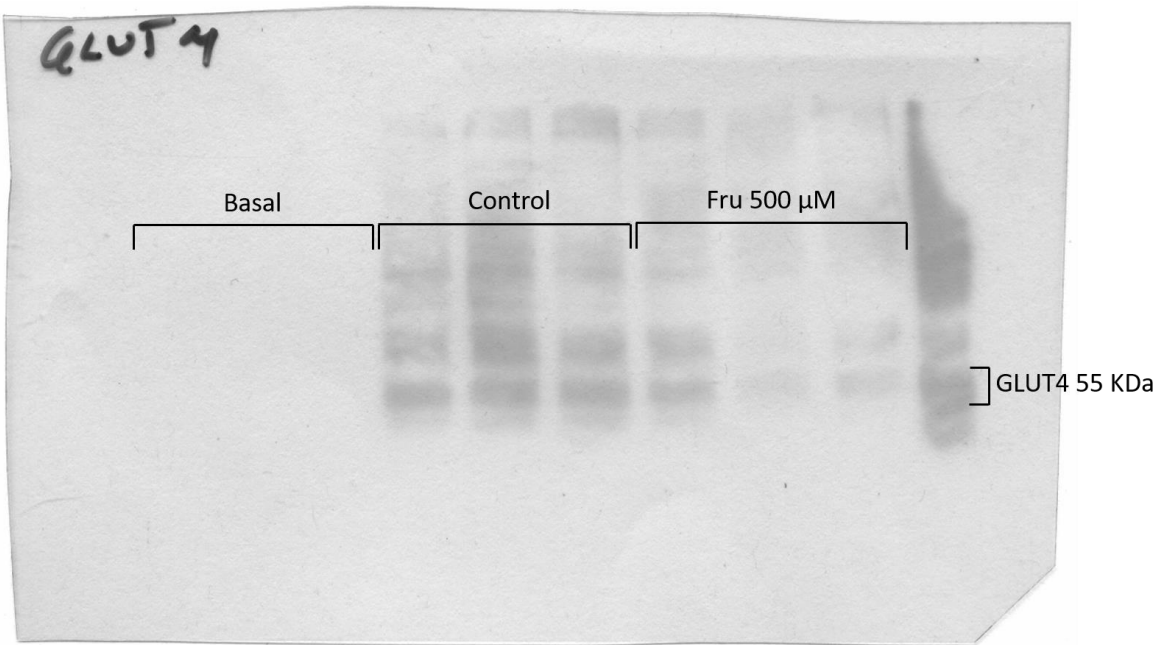

Supplement: Blots_3T3-L1_cells.pdf [file Blots_3T3-L1_cells.pdf]
